# Supplementary material for: A Phenolphthalein-Dummy Template Molecularly Imprinted Polymer for Highly Selective Extraction and Clean-Up of Bisphenol A in Complex Biological, Environmental and Food Samples
Source: MDPI journal article supplement (doi:10.3390/polym10101150), 2018-10-15
Supplement: s1 [file s1]

# Phenolphthalein-Dummy Template Molecularly Imprinted Polymer for Highly Selective Extraction and Clean-Up of Bisphenol A in Complex Biological, Environmental and Food Samples

Jiajia Yang <sup>1,†</sup>, Yun Li <sup>2,†</sup>, Chaonan Huang <sup>2,3</sup>, Yanna Jiao <sup>4</sup> and Jiping Chen <sup>2,\*</sup>

<sup>1</sup> College of Materials Science and Engineering, Hebei University of Engineering, 199 South Guangming Street, Handan 056038, China; yjj177@163.com (J.Y.)

<sup>2</sup> CAS Key Laboratory of Separation Sciences for Analytical Chemistry, Dalian Institute of Chemical Physics, Chinese Academy of Sciences, 457 Zhongshan Road, Dalian 116023, China; liyun@dicp.ac.cn (Y.L.); huangchaonan@dicp.ac.cn (C.H.)

<sup>3</sup> University of Chinese Academy of Sciences, Beijing 100049, China

<sup>4</sup> Inspection and Quarantine Technology Centre, Hunan Entry-Exit Inspection and Quarantine Bureau, Changsha 410004, China; 103993770@qq.com (Y.J.)

\* Correspondence: chenjp@dicp.ac.cn (J.C.); Tel.: +86-411-8437-9562

† These authors contributed equally to this work

## Supporting Information

**Figure S1.**

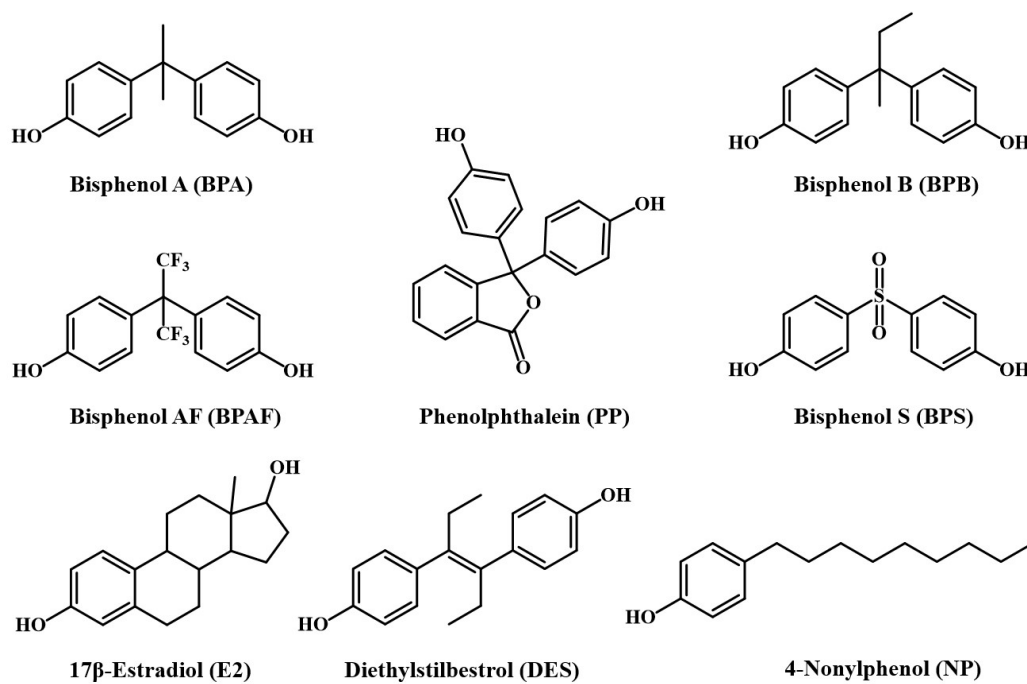

**Figure S1.** Molecular structures of BPA, PP, BPB, BPAF, BPS, E2, DES and NP.

**Figure S2.**

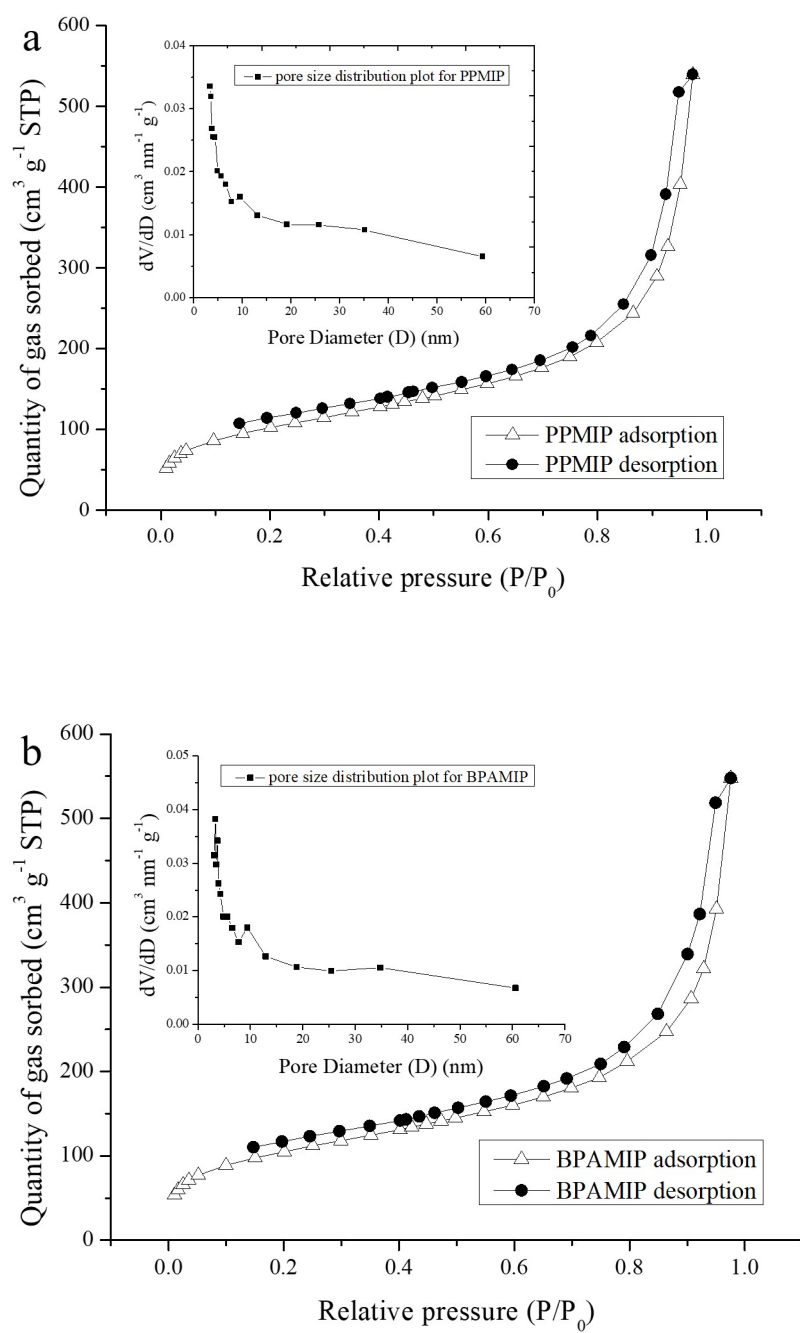

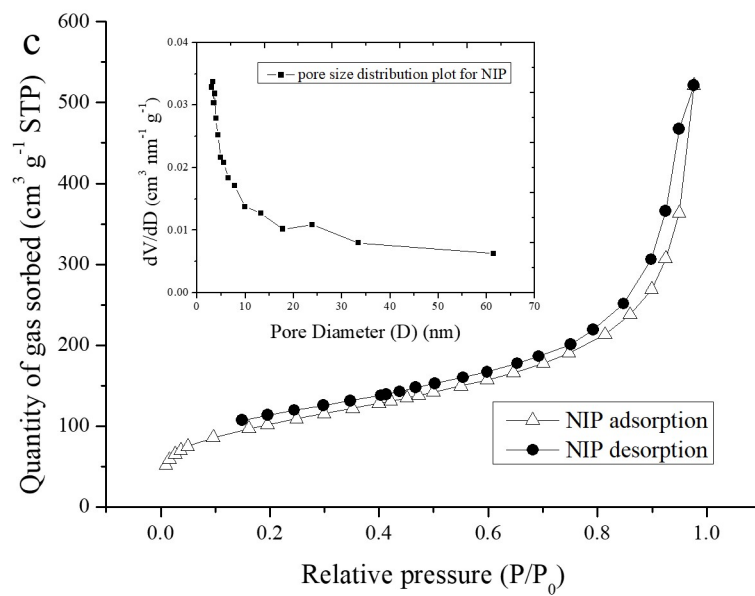

**Figure S2.** Nitrogen adsorption-desorption isotherms of PPMIP (a), BPAMIP (b) and NIP (c) (inset: pore size distribution plot).

**Figure S3.**

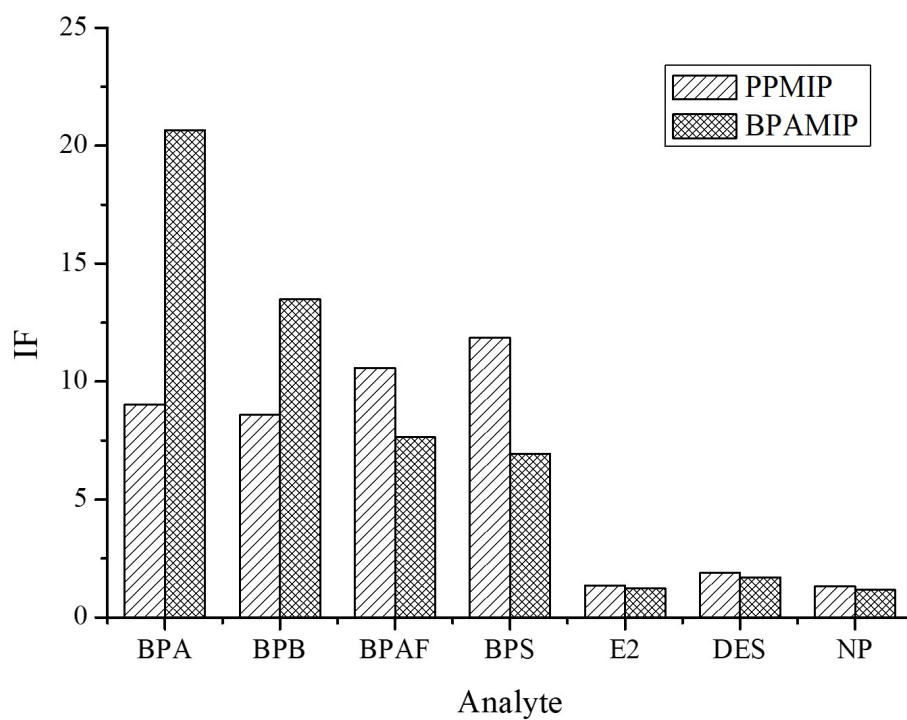

**Figure S3.** IF values of BPA, BPB, BPAF, BPS, E2, DES and NP for the PPMIP and BPAMIP.
